# Supplementary material for: Mechanism for H2 release from potential hydrogen storage materials of phosphine alane and phosphine borane in the presence or absence of alane or borane: a theoretical study
Source: Royal Society of Chemistry journal article supplement (doi:10.1039/c3ra43859g), 2013-01-01

## Supporting Materials

Table S1 Cartesian coordinates and total energies (a.u.) at the MP2/aug-cc-pvdz level of the relevant structures in the H<sub>2</sub>-release from AlH<sub>3</sub>PH<sub>3</sub>

|                                  |           |           |           |                       |           |           |           |
|----------------------------------|-----------|-----------|-----------|-----------------------|-----------|-----------|-----------|
| AlH <sub>3</sub>                 |           |           |           | PH <sub>3</sub>       |           |           |           |
| Energy = -243.7133604            |           |           |           | Energy = -342.6140538 |           |           |           |
| Al                               | 0.000000  | 0.000000  | 0.000000  | P                     | 0.000000  | 0.000000  | 0.128045  |
| H                                | 0.000000  | 1.586877  | 0.000000  | H                     | 0.000000  | 1.202235  | -0.640227 |
| H                                | 1.374276  | -0.793439 | 0.000000  | H                     | -1.041166 | -0.601118 | -0.640227 |
| H                                | -1.374276 | -0.793439 | 0.000000  | H                     | 1.041166  | -0.601118 | -0.640227 |
| AlH <sub>3</sub> PH <sub>3</sub> |           |           |           | alp-ts                |           |           |           |
| Energy = -586.3490281            |           |           |           | Energy = -586.2951395 |           |           |           |
| P                                | 0.000000  | 0.000000  | 1.186296  | P                     | -1.336627 | 0.000074  | 0.048135  |
| H                                | 0.000000  | -1.241385 | 1.869331  | H                     | -1.119896 | 1.056186  | -0.886636 |
| H                                | -1.075071 | 0.620692  | 1.869331  | H                     | -1.120603 | -1.056373 | -0.886412 |
| H                                | 1.075071  | 0.620692  | 1.869331  | H                     | 0.064138  | -0.000815 | 1.142848  |
| Al                               | 0.000000  | 0.000000  | -1.42869  | Al                    | 1.351058  | 0.000030  | -0.055211 |
| H                                | 0.000000  | 1.588672  | -1.609811 | H                     | 1.811557  | -1.438270 | -0.502849 |
| H                                | -1.375831 | -0.794336 | -1.609811 | H                     | 1.038949  | -0.001353 | 1.629111  |
| H                                | 1.375831  | -0.794336 | -1.609811 | H                     | 1.811498  | 1.439128  | -0.500344 |
| AlH <sub>2</sub> PH <sub>2</sub> |           |           |           |                       |           |           |           |
| Energy = -585.1825402            |           |           |           |                       |           |           |           |
| Al                               | 1.210441  | -0.000019 | 0.010946  |                       |           |           |           |
| H                                | 1.985800  | 1.383851  | -0.008345 |                       |           |           |           |
| H                                | 1.986346  | -1.383607 | -0.008354 |                       |           |           |           |
| P                                | -1.139212 | -0.000033 | -0.118603 |                       |           |           |           |
| H                                | -1.310163 | -1.056181 | 0.826956  |                       |           |           |           |
| H                                | -1.309545 | 1.056680  | 0.826502  |                       |           |           |           |

Table S2 Cartesian coordinates and total energies (au) at the MP2/aug-cc-pvdz level of the relevant structures in the H<sub>2</sub>-release from BH<sub>3</sub>PH<sub>3</sub>

|                                 |           |           |           |                       |           |           |           |
|---------------------------------|-----------|-----------|-----------|-----------------------|-----------|-----------|-----------|
| BH <sub>3</sub>                 |           |           |           | PH <sub>3</sub>       |           |           |           |
| Energy = -26.4867297            |           |           |           | Energy = -342.6140538 |           |           |           |
| B                               | 0.000000  | 0.000000  | 0.000000  | P                     | 0.000000  | 0.000000  | 0.128045  |
| H                               | 0.000000  | 1.201984  | 0.000000  | H                     | 0.000000  | 1.202235  | -0.640227 |
| H                               | 1.040949  | -0.600992 | 0.000000  | H                     | -1.041166 | -0.601118 | -0.640227 |
| H                               | -1.040949 | -0.600992 | 0.000000  | H                     | 1.041166  | -0.601118 | -0.640227 |
| BH <sub>3</sub> PH <sub>3</sub> |           |           |           | bp-ts                 |           |           |           |
| Energy = -369.1376326           |           |           |           | Energy = -369.0852497 |           |           |           |
| B                               | 0.000000  | 0.000000  | -1.403450 | P                     | 0.761958  | -0.032403 | -0.104893 |
| H                               | 1.010419  | 0.618226  | -1.682373 | H                     | 0.684483  | 1.321641  | 0.321488  |
| H                               | -1.040609 | 0.565935  | -1.682373 | H                     | 0.992267  | -0.53505  | 1.210675  |
| H                               | 0.030190  | -1.184162 | -1.682373 | H                     | -0.741597 | -0.947827 | -0.210747 |
| P                               | 0.000000  | 0.000000  | 0.560646  | H                     | -1.697344 | 0.346177  | 1.187612  |
| H                               | -0.031923 | 1.252769  | 1.218225  | H                     | -1.885671 | -1.038201 | -0.259719 |
| H                               | -1.068968 | -0.654030 | 1.218225  | H                     | -1.629203 | 0.807881  | -0.907599 |
| H                               | 1.100891  | -0.598738 | 1.218225  | B                     | -1.430462 | 0.106287  | 0.046337  |
| BH <sub>2</sub> PH <sub>2</sub> |           |           |           |                       |           |           |           |
| Energy = -367.9491181           |           |           |           |                       |           |           |           |
| B                               | -1.316046 | 0.000010  | 0.051578  |                       |           |           |           |
| H                               | -1.910424 | 1.043442  | 0.019506  |                       |           |           |           |
| H                               | -1.910360 | -1.043457 | 0.019382  |                       |           |           |           |
| P                               | 0.562636  | -0.000009 | -0.112373 |                       |           |           |           |
| H                               | 0.980767  | 1.087947  | 0.694309  |                       |           |           |           |
| H                               | 0.980698  | -1.087842 | 0.694512  |                       |           |           |           |

Table S3 Cartesian coordinates and total energies (au) at the MP2/aug-cc-pvdz level of the relevant structures in the H<sub>2</sub>-release from AlH<sub>3</sub>PH<sub>3</sub>+AlH<sub>3</sub>

|                       |           |           |           |                                                                   |           |           |           |
|-----------------------|-----------|-----------|-----------|-------------------------------------------------------------------|-----------|-----------|-----------|
| alalp-com1            |           |           |           | alalp-com2                                                        |           |           |           |
| Energy = -830.0940338 |           |           |           | Energy = -830.0632826                                             |           |           |           |
| H                     | 0.617896  | 1.950900  | 1.489225  | H                                                                 | -0.239669 | -0.880443 | 1.075406  |
| H                     | -1.125901 | 1.065977  | -0.388475 | H                                                                 | 3.341622  | -1.429894 | 0.000002  |
| H                     | 1.123730  | 2.150274  | -1.273197 | H                                                                 | -0.239669 | -0.880446 | -1.075404 |
| H                     | -1.847037 | -1.198784 | -1.393280 | H                                                                 | -0.443808 | 0.973129  | -0.000002 |
| H                     | -3.455253 | 0.189194  | 0.415249  | H                                                                 | 3.060361  | 0.937182  | -1.376455 |
| H                     | -1.070529 | -0.986153 | 1.161062  | H                                                                 | 3.060360  | 0.937186  | 1.376453  |
| H                     | 0.808683  | -1.836294 | -0.760745 | H                                                                 | -3.301894 | 1.680290  | -0.000002 |
| H                     | 2.782414  | -0.964342 | -0.463801 | H                                                                 | -3.310341 | -0.701558 | -1.373852 |
| H                     | 1.556946  | -1.480428 | 1.260933  | H                                                                 | -3.310342 | -0.701554 | 1.373854  |
| Al                    | -2.052247 | -0.431944 | -0.000537 | Al                                                                | 2.996256  | 0.129706  | 0.000000  |
| Al                    | 0.424924  | 1.487901  | -0.012269 | P                                                                 | 0.374441  | -0.188994 | 0.000000  |
| P                     | 1.450949  | -0.841186 | 0.007967  | Al                                                                | -3.321889 | 0.093449  | 0.000000  |
| alalp-tsalal          |           |           |           | alalp-tslew                                                       |           |           |           |
| Energy = -829.9906196 |           |           |           | Energy = -830.0288768                                             |           |           |           |
| H                     | -0.052621 | -1.559846 | -0.000021 | H                                                                 | -0.303107 | 1.487469  | -1.086574 |
| H                     | 3.348710  | -0.278331 | 1.383429  | H                                                                 | 3.375640  | 0.971334  | 0.000003  |
| H                     | -0.548634 | 2.001428  | -1.111504 | H                                                                 | -0.303107 | 1.487465  | 1.086578  |
| H                     | -2.428056 | -1.256623 | -1.436748 | H                                                                 | -0.808828 | -0.835504 | -0.000005 |
| H                     | -2.428024 | -1.256640 | 1.436758  | H                                                                 | 2.298655  | -1.165355 | 1.370633  |
| H                     | -0.548621 | 2.001427  | 1.111504  | H                                                                 | 2.298656  | -1.165349 | -1.370637 |
| H                     | 0.800592  | -1.207623 | -0.000008 | H                                                                 | -1.510528 | -1.691319 | -0.000006 |
| H                     | 0.900031  | 0.367923  | -0.000003 | H                                                                 | -3.024362 | 0.004115  | 1.447490  |
| H                     | 3.348714  | -0.278324 | -1.383427 | H                                                                 | -3.024367 | 0.004124  | -1.447486 |
| Al                    | -1.852733 | -0.922525 | 0.000001  | Al                                                                | 2.498684  | -0.362418 | 0.000000  |
| P                     | -0.771015 | 1.164225  | 0.000001  | P                                                                 | 0.078974  | 0.659913  | 0.000000  |
| Al                    | 2.558358  | -0.307996 | 0.000000  | Al                                                                | -2.512781 | -0.329556 | 0.000000  |
| alalp-tsalp           |           |           |           | AlH <sub>3</sub> AlH <sub>2</sub> PH <sub>2</sub> +H <sub>2</sub> |           |           |           |
| Energy = -830.0659317 |           |           |           | Energy = -830.0783449                                             |           |           |           |
| H                     | 0.577578  | 2.025507  | 1.450188  | H                                                                 | 0.274949  | 1.995786  | 1.350384  |
| H                     | -0.963175 | 1.001587  | -0.481734 | H                                                                 | -1.086536 | 0.903488  | -0.57836  |
| H                     | 1.232689  | 2.113912  | -1.305347 | H                                                                 | 0.995445  | 2.169477  | -1.345737 |
| H                     | -1.246057 | -1.476964 | -0.888748 | H                                                                 | -1.711490 | -1.737297 | -1.263268 |
| H                     | -3.477288 | 0.079358  | -0.555945 | H                                                                 | -3.536850 | -0.159978 | -0.540873 |
| H                     | -1.636563 | -0.596487 | 1.516085  | H                                                                 | -1.669744 | -0.793448 | 1.488921  |
| H                     | -0.323419 | -1.461335 | -0.557245 | H                                                                 | -1.014050 | -1.728719 | -0.936975 |
| H                     | 2.370872  | -1.245638 | -0.85352  | H                                                                 | 2.688231  | -0.68854  | -0.654775 |
| H                     | 1.755896  | -1.441014 | 1.247385  | H                                                                 | 1.994202  | -0.908905 | 1.334549  |
| Al                    | -2.03569  | -0.213955 | 0.026551  | Al                                                                | -2.101085 | -0.165953 | 0.112808  |
| Al                    | 0.686218  | 1.398324  | 0.000473  | Al                                                                | 0.657391  | 1.323499  | -0.043099 |

|                                                                   |           |           |           |   |          |           |          |
|-------------------------------------------------------------------|-----------|-----------|-----------|---|----------|-----------|----------|
| P                                                                 | 1.283507  | -0.959715 | 0.005171  | P | 1.455592 | -0.939998 | 0.015995 |
| AlH <sub>3</sub> PH <sub>2</sub> AlH <sub>2</sub> +H <sub>2</sub> |           |           |           |   |          |           |          |
| Energy = -830.0831199                                             |           |           |           |   |          |           |          |
| H                                                                 | 1.037443  | -2.295512 | 0.378000  |   |          |           |          |
| H                                                                 | -3.285538 | 0.459277  | -0.376332 |   |          |           |          |
| H                                                                 | 0.225189  | 1.916201  | 1.092471  |   |          |           |          |
| H                                                                 | 2.690435  | -0.657760 | 1.354458  |   |          |           |          |
| H                                                                 | 2.539030  | -0.714698 | -1.456958 |   |          |           |          |
| H                                                                 | 0.217999  | 1.889486  | -1.077664 |   |          |           |          |
| H                                                                 | 0.510025  | -2.064966 | -0.129275 |   |          |           |          |
| H                                                                 | -1.429690 | -1.441250 | -1.148075 |   |          |           |          |
| H                                                                 | -1.870482 | -1.045660 | 1.483690  |   |          |           |          |
| Al                                                                | 1.971604  | -0.379457 | -0.023711 |   |          |           |          |
| P                                                                 | 0.030611  | 1.011815  | 0.019470  |   |          |           |          |
| Al                                                                | -2.055725 | -0.483801 | -0.008009 |   |          |           |          |

Table S4 Cartesian coordinates and total energies (au) at the MP2/aug-cc-pvdz level of the relevant structures in the H<sub>2</sub>-release from AlH<sub>3</sub>PH<sub>3</sub>+BH<sub>3</sub>

| balp-com                                                         |           |           |           | balp-tsbp            |           |           |           |
|------------------------------------------------------------------|-----------|-----------|-----------|----------------------|-----------|-----------|-----------|
| Energy = -612.892835                                             |           |           |           | Energy = -612.837809 |           |           |           |
| H                                                                | -0.617799 | -1.407535 | -1.417743 | H                    | -1.116064 | 1.640669  | 1.412484  |
| H                                                                | -2.638031 | -0.352836 | 0.001267  | H                    | -1.658186 | -0.228753 | -0.636517 |
| H                                                                | -0.616762 | -1.407151 | 1.417835  | H                    | -0.70286  | 1.966833  | -1.354279 |
| H                                                                | -2.748809 | 1.351183  | 1.044597  | H                    | -0.775205 | -2.035181 | -0.642353 |
| H                                                                | -2.75006  | 1.349522  | -1.044909 | H                    | -2.661227 | -1.898838 | -0.176128 |
| H                                                                | -1.095599 | 1.013676  | -0.000812 | H                    | -1.272778 | -1.17476  | 1.175633  |
| H                                                                | 2.230137  | 1.011632  | 1.071566  | H                    | 0.002138  | -1.554455 | -0.367177 |
| H                                                                | 2.747748  | -0.768385 | -0.000796 | H                    | 2.360518  | 0.102028  | -0.842903 |
| H                                                                | 2.229817  | 1.013074  | -1.070722 | H                    | 1.940079  | -0.378329 | 1.261578  |
| Al                                                               | -0.839802 | -0.736928 | 0.000024  | Al                   | -0.58209  | 1.159863  | 0.006489  |
| P                                                                | 1.735245  | 0.224941  | -0.000037 | P                    | 1.309431  | -0.336679 | -0.003834 |
| B                                                                | -2.370378 | 0.880555  | -0.000006 | B                    | -1.638142 | -1.293451 | 0.028562  |
| BH <sub>3</sub> AlH <sub>2</sub> PH <sub>2</sub> +H <sub>2</sub> |           |           |           |                      |           |           |           |
| Energy = -612.8480829                                            |           |           |           |                      |           |           |           |
| H                                                                | -0.641776 | 1.821235  | 1.379164  |                      |           |           |           |
| H                                                                | -1.848548 | 0.232099  | -0.549705 |                      |           |           |           |
| H                                                                | -0.287809 | 2.001377  | -1.378263 |                      |           |           |           |
| H                                                                | -1.84113  | -1.806289 | -0.797422 |                      |           |           |           |
| H                                                                | -3.332276 | -1.073838 | -0.129612 |                      |           |           |           |
| H                                                                | -1.777672 | -0.911873 | 1.203514  |                      |           |           |           |
| H                                                                | -1.170568 | -1.679017 | -0.35272  |                      |           |           |           |
| H                                                                | 2.350036  | -0.058632 | -0.768607 |                      |           |           |           |
| H                                                                | 1.891024  | -0.448053 | 1.262255  |                      |           |           |           |
| Al                                                               | -0.152292 | 1.21711   | -0.002265 |                      |           |           |           |
| P                                                                | 1.305983  | -0.674345 | -0.017812 |                      |           |           |           |
| B                                                                | -2.190246 | -0.756853 | 0.085603  |                      |           |           |           |

Table S5 Cartesian coordinates and total energies (au) at the MP2/aug-cc-pvdz level of the relevant structures in the H<sub>2</sub>-release from BH<sub>3</sub>PH<sub>3</sub>+AlH<sub>3</sub>

|                       |           |           |           |                       |           |           |           |
|-----------------------|-----------|-----------|-----------|-----------------------|-----------|-----------|-----------|
| albp-com              |           |           |           | albp-tslew            |           |           |           |
| Energy = -612.8735671 |           |           |           | Energy = -612.7294306 |           |           |           |
| H                     | -1.034605 | -1.372187 | 0.877731  | H                     | -1.624183 | -0.845893 | 1.229830  |
| H                     | 0.685258  | 1.186161  | -0.454191 | H                     | 2.268934  | -0.502568 | -1.393473 |
| H                     | -1.574609 | -1.028118 | -1.229567 | H                     | -1.624463 | -0.845682 | -1.229845 |
| H                     | -2.784260 | -0.142424 | 0.376933  | H                     | -2.619119 | 0.518395  | 0.000216  |
| H                     | -1.056176 | 2.022077  | -0.821611 | H                     | 2.268481  | -0.502879 | 1.393627  |
| H                     | -0.483860 | 1.752095  | 1.134167  | H                     | -0.008755 | -1.467685 | -0.000239 |
| H                     | 3.127617  | 0.492674  | -0.643961 | H                     | -1.645850 | 1.278565  | 0.000143  |
| H                     | 1.067235  | -1.330746 | -0.841964 | H                     | -0.094560 | 1.764989  | -1.082152 |
| H                     | 1.687352  | -0.347509 | 1.587015  | H                     | -0.094502 | 1.764952  | 1.082166  |
| B                     | -0.456164 | 1.354473  | -0.006050 | P                     | -1.128326 | -0.391287 | -0.000026 |
| P                     | -1.437833 | -0.347421 | -0.003022 | Al                    | 1.604301  | -0.113631 | 0.000010  |
| Al                    | 1.862644  | -0.214852 | 0.007002  | B                     | -0.151401 | 1.236862  | -0.000002 |
| albp-tsalb1           |           |           |           | albp-tsalb2           |           |           |           |
| Energy = -612.7760806 |           |           |           | Energy = -612.8124818 |           |           |           |
| Al                    | -1.989580 | 0.010768  | 0.003955  | Al                    | -1.750053 | -0.258950 | -0.061592 |
| H                     | -0.015907 | 1.390393  | -0.387040 | H                     | 0.074397  | 1.483893  | -1.269415 |
| H                     | -1.702236 | 0.210075  | 1.561452  | H                     | 2.880965  | 0.203929  | -0.012734 |
| H                     | 1.656171  | -1.429817 | -1.037241 | H                     | 0.391189  | 1.964114  | 0.683130  |
| H                     | 2.038296  | 1.686191  | -0.925327 | H                     | -0.954545 | 0.693510  | 1.065212  |
| H                     | 1.466345  | 1.732738  | 1.143011  | H                     | 1.508559  | -1.008202 | 1.159655  |
| H                     | 1.040362  | -1.400894 | 1.134000  | H                     | 1.527571  | -1.192635 | -1.013728 |
| H                     | -0.840338 | 1.239312  | -0.749839 | H                     | -1.724349 | 0.225508  | 1.632548  |
| H                     | -0.538157 | -0.712119 | -0.601692 | H                     | -3.052214 | 0.328726  | -0.731272 |
| H                     | -3.453991 | -0.222675 | -0.576721 | H                     | -1.212246 | -1.758585 | -0.037298 |
| B                     | 1.514599  | 1.226620  | 0.054552  | P                     | 1.520453  | -0.203693 | -0.005420 |
| P                     | 1.242733  | -0.584419 | 0.007681  | B                     | 0.100913  | 1.096295  | -0.118819 |
| albp-tsalp1           |           |           |           | albp-tsalp2           |           |           |           |
| Energy = -612.8134632 |           |           |           | Energy = -612.8164997 |           |           |           |
| H                     | 0.539895  | -1.367973 | 1.093336  | H                     | -1.296238 | -1.498787 | -1.035881 |
| H                     | 3.308765  | -0.167352 | 0.000109  | H                     | 1.850895  | 0.504611  | 1.550844  |
| H                     | 0.539983  | -1.368153 | -1.093184 | H                     | -1.387889 | 1.566291  | -1.138286 |
| H                     | -0.345647 | 0.869252  | -0.000253 | H                     | 0.794016  | -1.261526 | -0.212005 |
| H                     | 2.254148  | 1.275061  | -1.023403 | H                     | -1.097318 | -1.45886  | 1.137362  |
| H                     | 2.254048  | 1.27523   | 1.023278  | H                     | 1.776042  | 1.076709  | -1.323466 |
| H                     | -1.126332 | 1.658211  | -0.000403 | H                     | 1.90545   | -1.403233 | -0.303148 |
| H                     | -2.416652 | -0.217752 | -1.448177 | H                     | -0.935729 | 1.777446  | 0.845548  |
| H                     | -2.416465 | -0.21704  | 1.44845   | H                     | -2.782295 | 1.059432  | 0.290505  |
| B                     | 2.390359  | 0.627158  | -0.000003 | Al                    | 1.679102  | 0.257391  | 0.009883  |
| P                     | 0.729959  | -0.486968 | 0.000011  | P                     | -0.839929 | -0.650213 | 0.002768  |

|                                                                         |           |           |           |                                                                  |           |           |           |
|-------------------------------------------------------------------------|-----------|-----------|-----------|------------------------------------------------------------------|-----------|-----------|-----------|
| Al                                                                      | -1.960994 | 0.186865  | 0.000008  | B                                                                | -1.611266 | 1.209005  | 0.003705  |
| albp-tsalp3                                                             |           |           |           | AlH <sub>2</sub> BH <sub>2</sub> PH <sub>3</sub> +H <sub>2</sub> |           |           |           |
| Energy = -612.8402397                                                   |           |           |           | Energy = -612.8450928                                            |           |           |           |
| B                                                                       | 0.221466  | 1.152447  | 0.055139  | H                                                                | 1.209695  | -1.482144 | -1.090949 |
| H                                                                       | -0.340201 | 1.024043  | -1.031245 | H                                                                | -2.245037 | -1.553986 | -0.009255 |
| H                                                                       | 0.207003  | -1.269423 | -0.426489 | H                                                                | 2.679082  | -0.319946 | 0.005006  |
| H                                                                       | -0.749966 | -1.429278 | -0.626674 | H                                                                | 3.424725  | 2.56758   | -0.010808 |
| Al                                                                      | -1.805392 | -0.174401 | 0.010312  | H                                                                | -3.263727 | 0.951186  | 0.000681  |
| H                                                                       | 2.610183  | 0.05526   | -0.907828 | H                                                                | 1.204907  | -1.494641 | 1.081075  |
| H                                                                       | 2.263608  | -0.433814 | 1.205984  | H                                                                | 2.675485  | 2.463472  | -0.009454 |
| H                                                                       | -0.526593 | 0.774358  | 0.987281  | H                                                                | 0.233895  | 1.475195  | 1.028681  |
| H                                                                       | 0.531929  | 2.291842  | 0.280455  | H                                                                | 0.237072  | 1.485368  | -1.01037  |
| H                                                                       | -2.797941 | 0.428739  | -1.062181 | P                                                                | 1.283144  | -0.584334 | 0.000431  |
| H                                                                       | -2.310078 | -0.805632 | 1.379475  | Al                                                               | -1.956957 | 0.031434  | -0.001489 |
| P                                                                       | 1.564988  | -0.275408 | -0.013902 | B                                                                | 0.007437  | 0.852856  | 0.00566   |
| AlH <sub>2</sub> PH <sub>2</sub> BH <sub>3</sub> +H <sub>2</sub>        |           |           |           | AlH <sub>3</sub> BH <sub>2</sub> PH <sub>2</sub> +H <sub>2</sub> |           |           |           |
| Energy = -612.8680247                                                   |           |           |           | Energy = -612.8743314                                            |           |           |           |
| H                                                                       | 0.834317  | -1.565684 | 1.087766  | B                                                                | 0.228431  | -0.496435 | 0.637558  |
| H                                                                       | 3.02985   | 0.530791  | 0.00001   | H                                                                | -0.562276 | 0.501939  | 0.798591  |
| H                                                                       | 0.834318  | -1.565681 | -1.087773 | H                                                                | -2.672122 | 2.3772    | 0.454424  |
| H                                                                       | -0.507554 | 1.989327  | 0.000009  | H                                                                | -2.971321 | 2.004841  | 1.041475  |
| H                                                                       | 1.529589  | 1.499756  | -1.017505 | Al                                                               | -1.772111 | -0.233569 | -0.265664 |
| H                                                                       | 1.529576  | 1.49976   | 1.017501  | H                                                                | 2.388825  | 0.824749  | 0.969251  |
| H                                                                       | -1.249828 | 2.185514  | -0.000023 | H                                                                | 2.635756  | -0.95727  | -0.07632  |
| H                                                                       | -2.319379 | 0.147888  | -1.404337 | H                                                                | -0.318468 | -1.265622 | -0.228452 |
| H                                                                       | -2.319367 | 0.14789   | 1.404348  | H                                                                | 0.251866  | -1.096169 | 1.682119  |
| B                                                                       | 1.881341  | 0.918392  | 0.000001  | H                                                                | -2.94894  | -0.89505  | 0.544229  |
| P                                                                       | 0.672809  | -0.672619 | -0.000002 | H                                                                | -1.822079 | 0.522453  | -1.644996 |
| Al                                                                      | -1.604643 | 0.048289  | 0.000002  | P                                                                | 1.860937  | 0.233433  | -0.218299 |
| cyclic-AlH <sub>2</sub> BH <sub>3</sub> PH <sub>2</sub> +H <sub>2</sub> |           |           |           |                                                                  |           |           |           |
| Energy = -612.8792263                                                   |           |           |           |                                                                  |           |           |           |
| H                                                                       | 1.304682  | 1.500953  | -1.117611 |                                                                  |           |           |           |
| H                                                                       | -1.792817 | -0.687099 | 1.433076  |                                                                  |           |           |           |
| H                                                                       | 1.827709  | -1.427604 | -1.038804 |                                                                  |           |           |           |
| H                                                                       | -3.1751   | 1.840256  | 0.378452  |                                                                  |           |           |           |
| H                                                                       | 1.304245  | 1.501336  | 1.117354  |                                                                  |           |           |           |
| H                                                                       | -1.792497 | -0.687645 | -1.433453 |                                                                  |           |           |           |
| H                                                                       | -3.175917 | 1.839596  | -0.377189 |                                                                  |           |           |           |
| H                                                                       | 0.176631  | -1.773529 | 0.000394  |                                                                  |           |           |           |
| H                                                                       | 1.827543  | -1.427205 | 1.039654  |                                                                  |           |           |           |
| Al                                                                      | -1.145911 | -0.562255 | -0.00014  |                                                                  |           |           |           |
| P                                                                       | 0.794644  | 0.81665   | -0.000111 |                                                                  |           |           |           |
| B                                                                       | 1.294539  | -1.123899 | 0.000324  |                                                                  |           |           |           |

Table S6 Cartesian coordinates and total energies (au) at the MP2/aug-cc-pvdz level of the relevant structures in the H<sub>2</sub>-release from BH<sub>3</sub>PH<sub>3</sub>+BH<sub>3</sub>

|                       |           |           |           |                       |           |           |           |
|-----------------------|-----------|-----------|-----------|-----------------------|-----------|-----------|-----------|
| bbp-com1              |           |           |           | bbp-com2              |           |           |           |
| Energy = -395.6488159 |           |           |           | Energy = -395.6262089 |           |           |           |
| H                     | 1.517325  | 0.740083  | -0.355217 | H                     | -0.179141 | -0.633771 | 1.242751  |
| H                     | 1.287821  | -1.290815 | -0.749563 | H                     | 2.864165  | -0.517421 | 0.460926  |
| H                     | -2.292451 | 0.289219  | 0.250209  | H                     | 0.107991  | -1.430182 | -0.756583 |
| H                     | 0.386825  | 1.675856  | 1.095994  | H                     | -0.617804 | 0.598106  | -0.495995 |
| H                     | 0.084023  | 1.892102  | -0.928119 | H                     | 2.443223  | 0.641362  | -1.180634 |
| H                     | -1.182077 | -0.913586 | -1.209813 | H                     | 2.167058  | 1.39729   | 0.708918  |
| H                     | 3.023604  | -0.302783 | -0.314825 | H                     | -3.089452 | 0.961292  | -0.948359 |
| H                     | -0.885726 | -1.252295 | 0.949937  | H                     | -2.943876 | -0.954129 | -0.145503 |
| H                     | 1.688456  | -0.715256 | 1.191838  | H                     | -2.894944 | 0.706165  | 1.109205  |
| B                     | 0.375969  | 1.169808  | 0.002093  | B                     | 2.23378   | 0.414188  | -0.004213 |
| P                     | -0.994269 | -0.217103 | 0.000751  | B                     | -2.976231 | 0.238514  | 0.005012  |
| B                     | 1.881279  | -0.543005 | 0.009567  | P                     | 0.390336  | -0.268815 | 0.000085  |
| bbp-tslew             |           |           |           | bbp-tsbb              |           |           |           |
| Energy = -395.4987052 |           |           |           | Energy = -395.5452977 |           |           |           |
| H                     | 1.059445  | -0.792948 | -1.234828 | H                     | -0.600783 | 1.291568  | -0.262866 |
| H                     | 1.059416  | -0.793155 | 1.234696  | H                     | -1.879255 | 0.115889  | 1.183624  |
| H                     | 2.28814   | 0.382792  | 0.000049  | H                     | 1.005484  | -1.396056 | -1.092209 |
| H                     | -0.568106 | -1.484733 | -0.000152 | H                     | 1.383232  | 1.718746  | -0.953941 |
| H                     | 1.293409  | 1.139284  | 0.000094  | H                     | 0.893017  | 1.757559  | 1.130165  |
| H                     | -0.616002 | 1.728576  | 1.060431  | H                     | 0.455856  | -1.419248 | 1.100099  |
| H                     | -0.615995 | 1.728703  | -1.060216 | H                     | -1.47379  | 1.020557  | -0.617274 |
| P                     | 0.682847  | -0.248696 | -0.000025 | H                     | -1.194436 | -0.589375 | -0.617678 |
| B                     | -0.579162 | 1.161773  | 0.000074  | H                     | -3.293677 | -0.176797 | -0.333516 |
| B                     | -1.447406 | -0.525558 | -0.000015 | B                     | 0.879895  | 1.25872   | 0.036787  |
| H                     | -2.00502  | -0.679674 | 1.061215  | P                     | 0.736466  | -0.571581 | 0.015399  |
| H                     | -2.005151 | -0.679487 | -1.061203 | B                     | -2.148422 | -0.008546 | 0.009735  |
| bbp-tsbp1             |           |           |           | bbp-tsbp2             |           |           |           |
| Energy = -395.6093632 |           |           |           | Energy = -395.5997264 |           |           |           |
| H                     | -0.262841 | -1.204566 | 1.14524   | H                     | 0.513029  | -1.179619 | -0.495781 |
| H                     | 2.637257  | -0.260173 | 0.230517  | H                     | 1.575237  | -0.688487 | 1.193113  |
| H                     | -0.007145 | -1.481351 | -0.992752 | H                     | 0.144312  | 1.910626  | -0.962972 |
| H                     | -0.906378 | 0.591954  | -0.791138 | H                     | -2.174695 | 0.101416  | -0.749333 |
| H                     | 1.78917   | 1.053082  | -1.102018 | H                     | -1.572473 | -0.449074 | 1.280038  |
| H                     | 1.586609  | 1.370139  | 0.91435   | H                     | 0.467209  | 1.726084  | 1.076281  |
| H                     | -1.952412 | 1.291485  | -0.857496 | H                     | 1.384494  | -1.299416 | -0.795244 |
| H                     | -2.572059 | -0.47921  | -0.079107 | H                     | 1.433722  | 0.686804  | -0.447087 |
| H                     | -1.647644 | 1.050347  | 1.105912  | H                     | 3.042756  | -0.422631 | -0.259611 |
| B                     | 1.773881  | 0.570353  | 0.017501  | P                     | -1.029996 | -0.293539 | -0.017245 |
| B                     | -1.857839 | 0.470104  | 0.077018  | B                     | 0.246268  | 1.207489  | 0.015763  |



|                                                                 |           |           |           |                                                                 |           |           |           |
|-----------------------------------------------------------------|-----------|-----------|-----------|-----------------------------------------------------------------|-----------|-----------|-----------|
| P                                                               | 0.117016  | -0.4756   | -0.003073 | B                                                               | 1.881001  | -0.404013 | 0.06809   |
| BH <sub>3</sub> BH <sub>2</sub> PH <sub>2</sub> +H <sub>2</sub> |           |           |           | BH <sub>3</sub> PH <sub>2</sub> BH <sub>2</sub> +H <sub>2</sub> |           |           |           |
| Energy = -395.6057209                                           |           |           |           | Energy = -395.6257217                                           |           |           |           |
| H                                                               | 1.200942  | -1.322525 | -0.464265 | H                                                               | 0.158718  | -1.340441 | -1.097187 |
| H                                                               | 1.678771  | -0.644056 | 1.204989  | H                                                               | 0.157855  | -1.341477 | 1.096296  |
| H                                                               | 0.129042  | 1.841823  | -1.004864 | H                                                               | 3.246111  | -0.500304 | 0.377193  |
| H                                                               | -2.224725 | 0.312386  | -0.643682 | H                                                               | -2.657511 | -0.462889 | -0.000763 |
| H                                                               | -1.621172 | -0.289733 | 1.298836  | H                                                               | 3.260234  | -0.47656  | -0.379655 |
| H                                                               | 0.410523  | 1.694923  | 1.039705  | H                                                               | 1.662721  | 1.314071  | 1.048525  |
| H                                                               | 1.8838    | -1.246186 | -0.901599 | H                                                               | 1.66298   | 1.315075  | -1.046097 |
| H                                                               | 1.46239   | 0.693264  | -0.456645 | P                                                               | -0.078488 | -0.480586 | -0.000138 |
| H                                                               | 3.186058  | -0.245486 | -0.149383 | B                                                               | 1.314858  | 0.850256  | 0.000973  |
| P                                                               | -1.125231 | -0.351309 | -0.032964 | B                                                               | -1.852687 | 0.448334  | -0.000228 |
| B                                                               | 0.143555  | 1.162234  | -0.00513  | H                                                               | -1.812609 | 1.103819  | 1.025185  |
| B                                                               | 2.011014  | -0.26719  | 0.119403  | H                                                               | -1.812036 | 1.10455   | -1.025156 |

Figure S1 Selected MP2/aVDZ geometry parameters of the complexes and products for H<sub>2</sub>-release from AlH<sub>3</sub>PH<sub>3</sub>, BH<sub>3</sub>PH<sub>3</sub> without or with the presence of AlH<sub>3</sub>, BH<sub>3</sub>. Bond lengths in nanometers and bond angles in degrees.

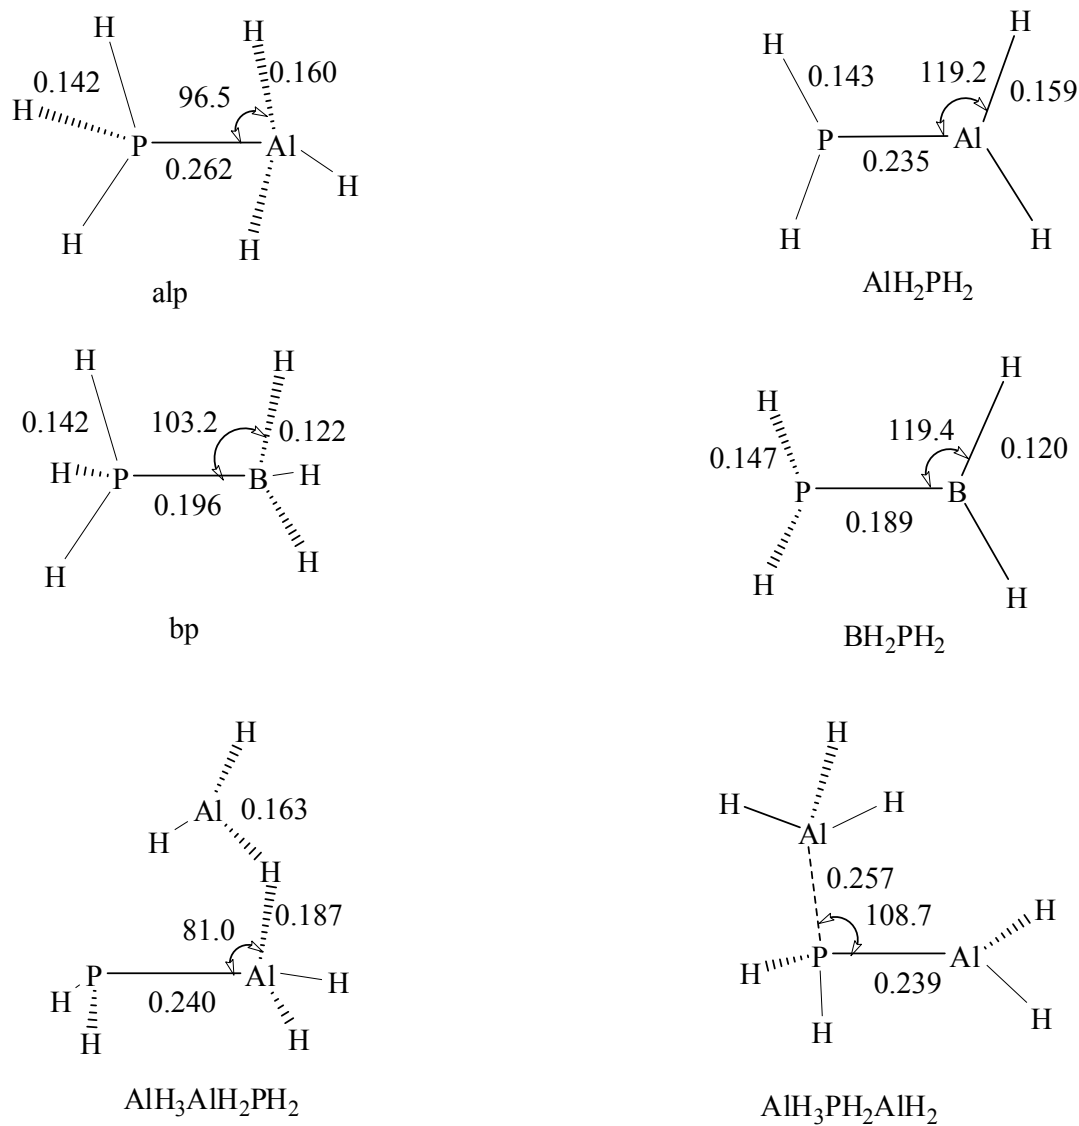

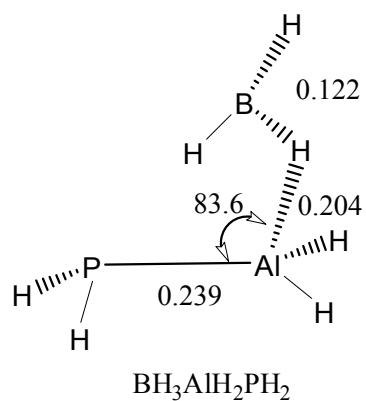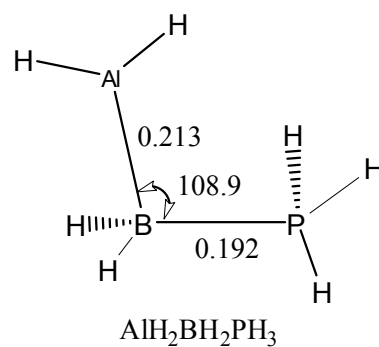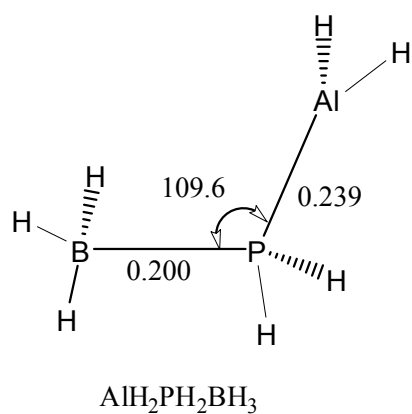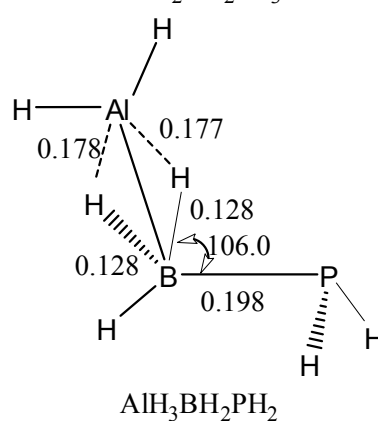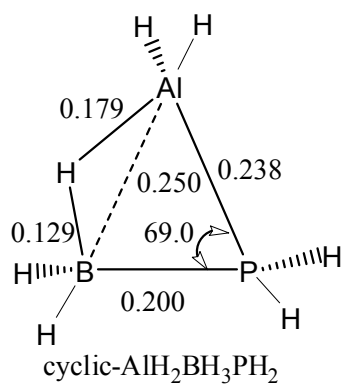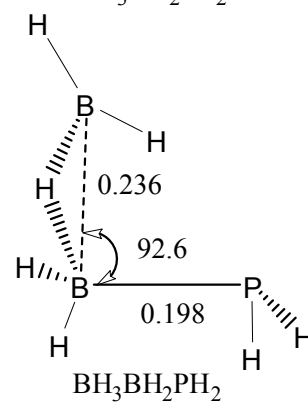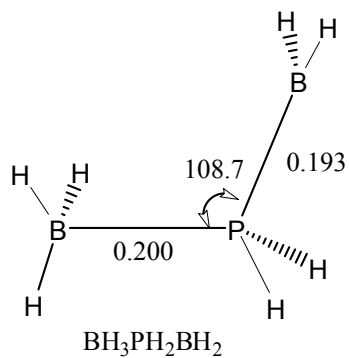

Supplement: c3ra43859g.pdf [file c3ra43859g.pdf]
